# Supplementary material
Source: PubMed Central journal article supplement (PMC2903910)

1 **SUPPLEMENTAL FIGURE LEGENDS**

2

3 **S. FIG. 1. Additional characterizations of WT and ATF3 KO mice on 60% fat diet.** A-C: WT (black  
4 lines) and ATF3 KO (grey lines) mice were placed on HFD (solid lines) or normal chow (dotted lines) and  
5 monitored for body weight (A), diet consumption (B) and fasting glucose (C). Shown is a representative of  
6 four HFD experiments (N= 10-15 mice per group for each experiment). D: Epididymal fat from WT and  
7 ATF3 KO mice on HFD or normal chow for 12 weeks were examined by hematoxylin and eosin. Multiple  
8 sections from 5 mice per group were analyzed and shown are four images from each group. Similar results  
9 were obtained from two independent HFD experiments. E: WT and KO mice fed with normal chow or  
10 HFD for 12 weeks were injected with insulin via the hepatic portal vein (HPV) as in Figure 1 D.  
11 Epididymal fat and livers were collected at 5 minutes after injection and analyzed by immunoblot for ATF3  
12 and actin. Shown is a representative blot of two independent experiments, where extracts from 4 mice per  
13 group were pooled for analysis. F: WT mice on HFD (white bars) or normal chow (black bars) for 12  
14 weeks were examined for ATF3 induction in the indicated tissues by qRT-PCR. G: Serum from overnight  
15 fasted WT (black bars) and ATF3 KO (white bars) mice on HFD for 12 weeks was analyzed for TNF $\alpha$  by  
16 ELISA. Shown is a representative of two experiments (N= 5 mice per group). Presented are means  
17  $\pm$ S.E.M. from 5 mice. \* p< 0.001 HFD vs. normal chow.

18

19 **S. FIG. 2. Characterizations of WT and ATF3 KO mice on 45% fat diet.** A: WT (black lines) and  
20 ATF3 KO (grey lines) mice were placed on 10% fat (dotted lines) or 45% fat (solid lines) diet and  
21 monitored for intraperitoneal glucose tolerance tests at 8 weeks on diet. N= 10-15 mice per group. B: WT  
22 and KO mice as treated in (A) for 8 weeks were analyzed by intraperitoneal insulin tolerance test. N= 10-  
23 15 mice per group. As controls, diabetic db/db mouse (solid line/open circle, N= 2) and non-diabetic WT  
24 mouse (dashed line/open circle; N= 2) were included. C: WT and KO mice as treated in (A) for 8 weeks  
25 were analyzed for fasting serum insulin levels. Presented are means  $\pm$ S.E.M. \* p< 0.02, \*\* p< 0.005 KO  
26 vs. WT.

27

28 **S. FIG. 3. ATF3 does not affect islet Ca<sup>2+</sup> oscillations in islets exposed to 11mM glucose.** A: Fura2-  
29 loaded primary islets from WT or ATF3 KO mice were analyzed for Ca<sup>2+</sup> oscillation at 11 mM glucose.  
30 Shown are representative traces from 50 islets. WT and KO islets. B-C: Period (B) and amplitude (C) of  
31 Ca<sup>2+</sup> oscillation were quantified (N=50 islets). Presented are means ±S.E.M. WT: black bars; KO: white  
32 bars; \* p< 0.02, KO vs. WT.

33

### 34 SUPPLEMENTAL METHODS

35

36 **Chromatin immunoprecipitation assay.** Cells or islets were fixed with 1% formaldehyde for 10 min with  
37 gentle shaking. Crosslinking was stopped by adding glycine to a final concentration of 0.125 M and  
38 incubation for 5 min. Cells were rinsed twice with PBS, harvested in PBS with scrapers, pelleted and  
39 resuspended in 1 ml cell lysis buffer (5mM PIPES pH 8.0, 85mM KCL, 0.5% NP40) with protease  
40 inhibitors using complete protease inhibitor cocktail tablets (Roche Applied Science). After incubation on  
41 ice for 10 min, nuclei were pelleted and resuspended in 0.5 ml of CHIP buffer (1:9 ratio of Nuclei Lysis  
42 buffer [50mM Tris-Cl pH 8.1, 10mM EDTA, 1% SDS] to IP Dilution buffer [16.7mM Tris-Cl pH 8.1,  
43 1.2mM EDTA, 167mM NaCl, 0.01% SDS, 1.1% Triton X 100]) with protease inhibitors (same as that in  
44 the cell lysis buffer) and incubated on ice for 10 min. Nuclei suspensions were sonicated using Misonix  
45 Sonicator® 3000 (microtip) with 25 cycles of 5 sec pulses at a 15 sec interval using output setting #5.  
46 Lysates were centrifuged at 4 °C for 10 min at 14,000 rpm and the DNA concentration of the supernatant  
47 was quantitated. Either 100µg (for detection of ectopically expressed ATF3) or 900µg (for detection of  
48 endogenously expressed ATF3) was incubated with 2 µg of rabbit IgG (Santa Cruz) or the indicated  
49 antibodies: anti-Pol II (Covance), anti-ATF3 (Santa Cruz). After overnight incubation at 4 °C with gentle  
50 rocking, 20 µl of 50% protein A bead slurry (pre-blocked with 200 µg/ml tRNA and 0.1% BSA) was added  
51 to each sample. After rocking at 4 °C for 1 h, the beads were pelleted and washed 1 time with CHIP buffer  
52 (0.01% SDS, 1.1% Triton X 100, 1.2 mM EDTA, 16.7 mM Tris-HCl, pH 8.1, 167 mM NaCl), 1 time with

53 Low Salt buffer (20mM Tris-HCl pH 8.1, 2mM EDTA, 150mM NaCl, 0.1% SDS, 1% Triton X 100), 1  
54 time with High Salt buffer (20mM Tris-HCl pH 8.1, 2mM EDTA, 500mM NaCl, 0.1% SDS, 1% Triton X  
55 100), 1 time with LiCl buffer (10mM Tris-HCl pH 8.1, 1mM EDTA, 250mM LiCl, 1% IGEPALCA630,  
56 1% deoxycholic acid), and 2 times with TE buffer (10mM Tris-HCl pH 8.1, 1mM EDTA).  
57 Immunocomplexes were eluted twice with 250  $\mu$ l of elution buffer (100 mM NaHCO<sub>3</sub>, 1% SDS) by  
58 rocking at room temperature for 15 min each time. Eluents were combined and supplemented with NaCl to  
59 final concentration of 0.3 M and 3  $\mu$ l of 10 mg/ml RNaseA. The reaction mix was incubated at 65 °C for 5  
60 h to reverse the crosslinking and digest the RNAs. Each sample was supplemented with 2  $\mu$ l of 10 mg/ml  
61 proteinase K, 20  $\mu$ l of Tris/HCl (1M, pH 6.5) and 10  $\mu$ l of EDTA (0.5 M, pH8.0) and further incubated in  
62 50 °C for 2 h to digest the proteins. DNA was purified by phenol/chloroform extraction and ethanol  
63 precipitation in the presence of 20  $\mu$ g of glycogen (as carrier). DNA pellet was resuspended in 40  $\mu$ l of TE  
64 and 2  $\mu$ l was used in each PCR reaction.

65 **SUPPLEMENTAL TABLE**

66

67 **S. Table 1 Primers used in this study.** Genomic and mRNA sequence information was extracted from  
 68 the Human Genome Browser Gateway. Rat and mouse primer sequences were designed for each gene  
 69 using PerlPrimer (version 1.1.14).

70

| Assays | Gene            | Species    | Forward primer (5' to 3') | Reverse primer (5' to 3') |                           |
|--------|-----------------|------------|---------------------------|---------------------------|---------------------------|
|        | ATF3            | Mouse      | GAGATGTCAGTCACCAAGTC      | CAGTTCTCTGACTCTTTCTGC     |                           |
|        | Insulin 1       | Mouse      | AGGTCATTGTTTCAACATGGC     | GACCACAAAGATGCTGTTTG      |                           |
|        | Insulin 1       | Rat        | GCAAGCAGGTCATTGTTCC       | AGGTGAGGACCACAAAGG        |                           |
| RT-PCR | Insulin 2       | Mouse      | TGGCTTCTTCTACACACCCAAG    | ACAATGCCACTCTTCTGCC       |                           |
|        | Insulin 2       | Rat        | TGTCAAACAGCACCTTTGTG      | CAGTTGTGCCACTTGTGG        |                           |
|        | Pre-Insulin2    | Mouse      | GGGGAGCGTGGCTTCTTCTA      | GGGACAGAATTCAGTGGCA       |                           |
|        | $\beta$ -actin  | Mouse      | AAGATCAAGATCATTGCTCCTC    | GGACTCATCGTACTCCTG        |                           |
|        | $\beta$ -actin  | Rat        | GGTAAAAAATGCTGCACTG       | GGTTTATAGGACGCCAC         |                           |
|        | $\alpha$ -actin | Rat        | AATATGGCTTGGGAAGGG        | TACCTGCTGCTCTGACTC        |                           |
| ChIP   | Insulin 1 (bp)  | (D) - 1200 | Rat                       | TCATGGATGGCACTGGAGAAGTTA  | GGTTCCAATGTAGGCGCCATAATAA |
|        |                 | (P) -200   | Rat                       | CAATGATTGTGCTGTGAACTG     | GGCTGAAGCTGTAATTTCCA      |
|        |                 | (3') +1200 | Rat                       | CCTCTGCAATGAATAAAGCC      | GGTTACACAATCATGCAGTTTT    |

71

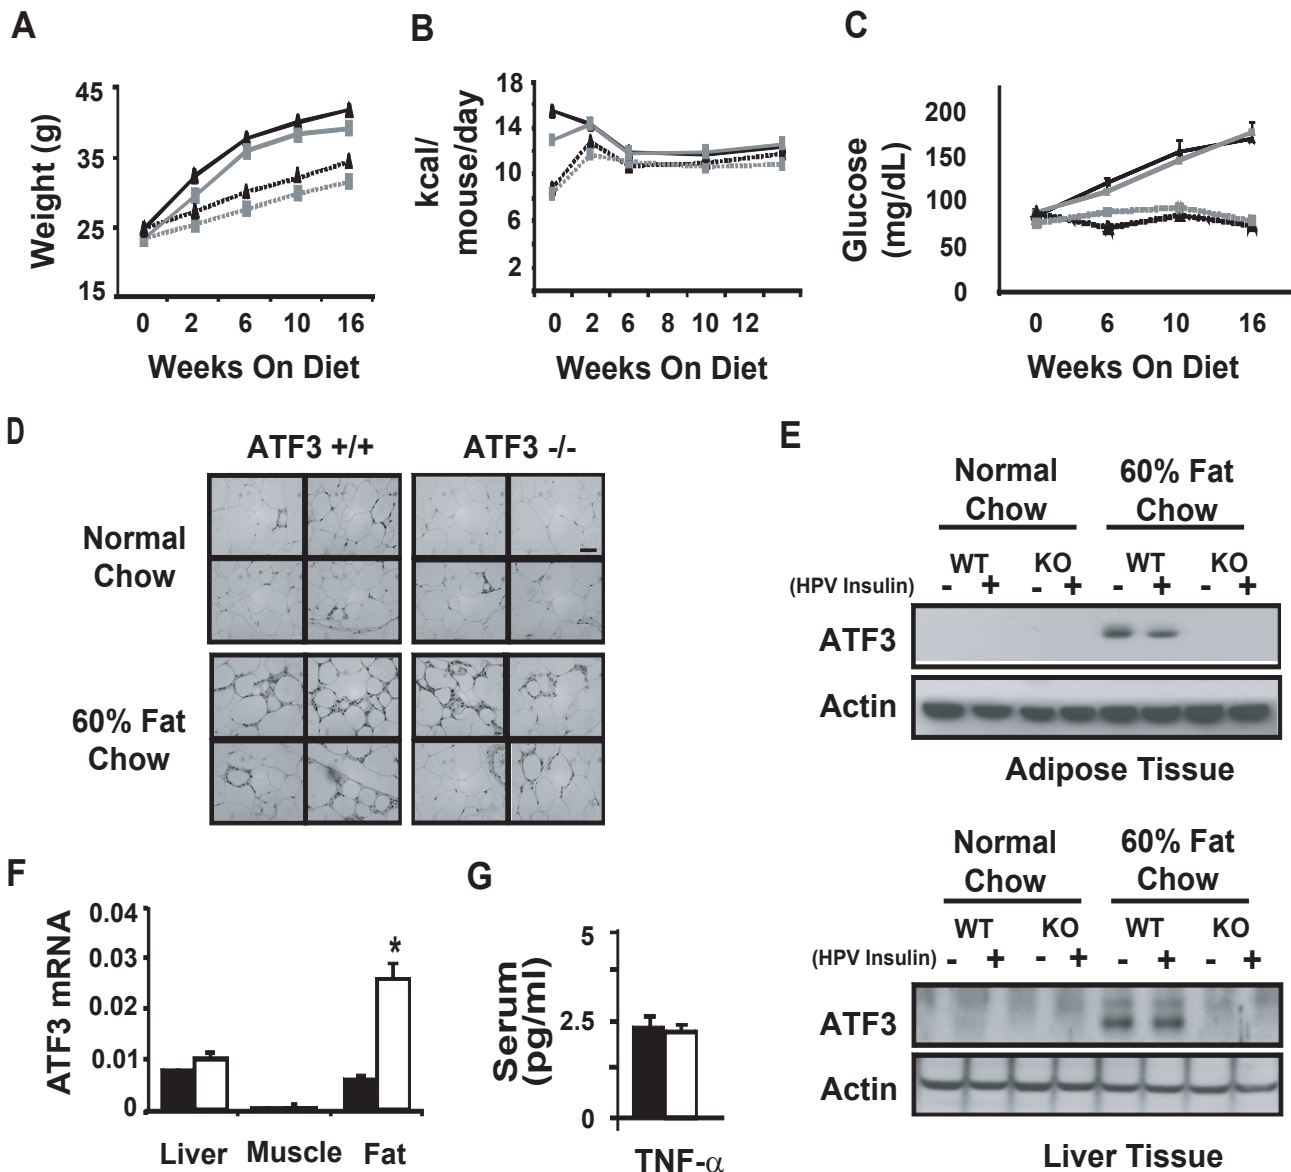

**A**

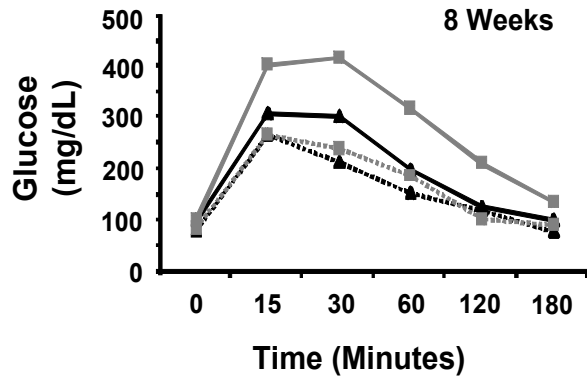

**B**

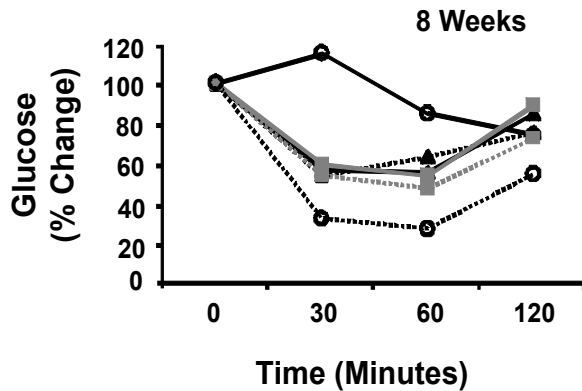

**C**

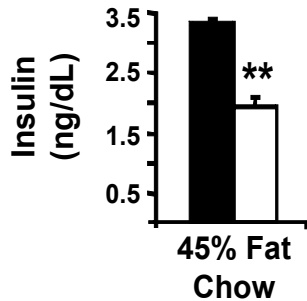

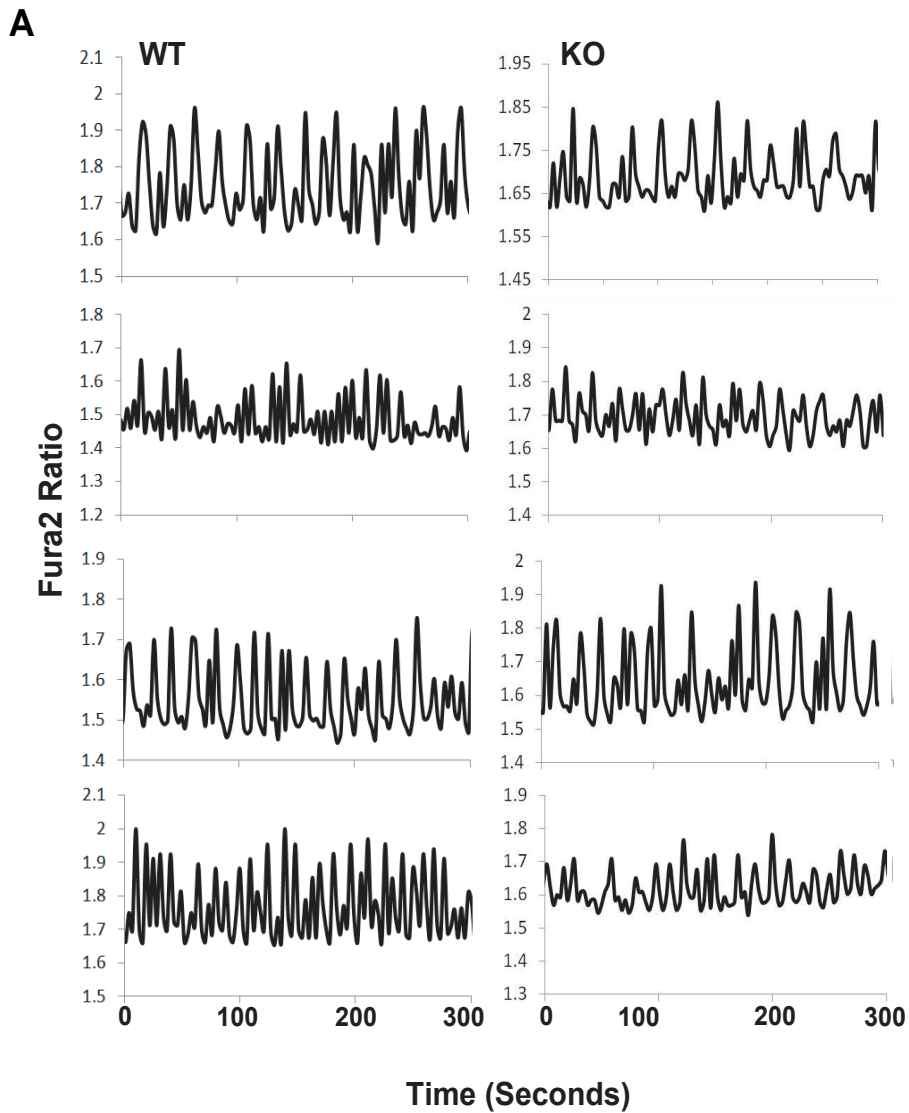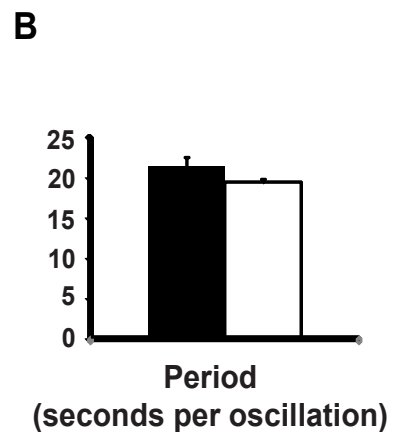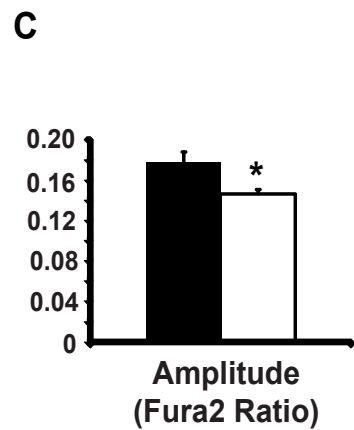

Supplement: me.2009-0463_1.pdf [file me.2009-0463_1.pdf]
